# Supplementary material for: Effect of bacterial growth stage on the response to two-dimensional nanomaterials
Source: Royal Society of Chemistry journal article supplement (doi:10.1039/d2en00716a), 2022-12-02
Supplement: d2en00716a1.pdf [file d2en00716a1.pdf]

Supplemental Information for:

Effect of Bacterial Growth Stage on the Response to Two-Dimensional Nanomaterials

Zachary Shepard<sup>1</sup>, Zachary S.S.L. Saleeba<sup>2</sup>, Muchun Liu<sup>3</sup>, Robert H. Hurt<sup>2</sup>, Vinka Oyanedel-Craver<sup>1,\*</sup>

<sup>1</sup>Department of Civil & Environmental Engineering, University of Rhode Island, Kingston, RI, 02881

<sup>2</sup>School of Engineering, Brown University, Providence, RI 02912

<sup>3</sup>Department of Civil and Environmental Engineering, Massachusetts Institute of Technology, Cambridge, MA, 02139

\*Corresponding author: Vinka Craver, [craver@uri.edu](mailto:craver@uri.edu)

## Supplemental Methods:

### *2D nanomaterial synthesis and characterization*

Suspended MoS<sub>2</sub> and MoSe<sub>2</sub> nanosheets were synthesized from bulk MoS<sub>2</sub> and MoSe<sub>2</sub> powders by a previously established chemical exfoliation method.<sup>1</sup> In that method, 3 mL of 1.6 M n-butyllithium in hexane was added to 300 mg of MoS<sub>2</sub> bulk powder. For MoSe<sub>2</sub> nanosheets, 3 mL of n-butyllithium was added to 476 mg MoSe<sub>2</sub> bulk powder. Both were left under mild stirring conditions at room temperature in a nitrogen purged glove box for 24 and 48 hrs for MoSe<sub>2</sub> and MoS<sub>2</sub>, respectively. The resulting intercalation compounds were washed twice via centrifugation of 50 mL samples at 4000 RPM for 30 min with hexane to remove excess organo-lithium reagent and any organic by-products. The intercalation compound was then decomposed in DI water in an ultrasonic bath for 30 min to achieve exfoliation. Any unexfoliated MoS<sub>2</sub> or MoSe<sub>2</sub> solids were removed by centrifugation at 1000 RPM for 15 minutes. The final supernatant contained well-dispersed TMD nanosheets from which lithium hydroxide (LiOH) was removed through dialysis (3.5kDa MWCO), using DI water as a receiving fluid. The receiving fluid pH was monitored and refreshed when it became basic approximately 6 times over a 3-day period until the receiving fluid remained neutral. Dialysis was performed in a nitrogen purged glove bag.

GO in suspension was produced using a modified Hummers' method using the protocol from Li et al. 2013.<sup>2</sup> Briefly, 10 g of potassium persulfate and 10 g phosphorus pentoxide were dissolved in 100 mL sulfuric acid that has been pre-heated to 80°C. This formed a pretreatment acid wash that was applied to 14 g of Bay Carbon Inc. SP-1 grade graphite powder, and the mixture held at 80°C for 5 hrs. The mixture is rapidly cooled in an ice bath and the acid is slowly dissociated with 200 mL of DI water. The resulting mixture was vacuum filtered through a 0.2 µm filter, rinsed with 1L of DI water, and left to dry overnight. The intercalated graphite was then added to a

mixture of 10 g sodium nitrate dissolved in 500 mL of sulfuric acid. 70 g of potassium permanganate was slowly added while controlling the resulting exothermic reaction by keeping the mixture temperature below 10°C. Once potassium permanganate was fully dissolved, it was then gently heated to 40° C and held for 3 hrs and then quickly cooled once again in an ice bath. The acid was then dissociated with the addition of 1L of DI water and limiting the temperature to 55°C. 60 mL of 30% hydrogen peroxide was then added dropwise and then left stirring over night to allow for complete consumption. The resulting solution was then acid washed to remove any residual salts with 1M hydrochloric acid and centrifuged at 4000 RPM for 30 min, which was done 5 times. This was followed by an acetone wash under the same centrifugation conditions. The resulting material was then left to dry for 72 hours in the fume hood. Once fully dried, 4 g of dried sample was dispersed in 1L of DI and sonicated for 40 min and then centrifuged for 5 min at 1000rpm for a total of 3 times.

X-ray diffraction (XRD) analysis was performed on a Bruker D8 Discover X-ray Diffraction System. X-ray photoelectron spectroscopy (XPS) analysis was performed on a Thermo Scientific K-Alpha XPS.

Table S1: Microplate layout for respiration and growth assays

|   | 2 | 3 | 4 | 5 | 6 | 7 | 8 | 9 | 10 | 11 | 12 | 13 | 14 | 15 | 16 | 17 | 18 | 19 | 20 | 21 | 22 | 23  |   |
|---|---|---|---|---|---|---|---|---|----|----|----|----|----|----|----|----|----|----|----|----|----|-----|---|
| A |   |   |   |   |   |   |   |   |    |    |    |    |    |    |    | 2  | 4  | 7  | 9  | 12 | 14 | Bac | A |
| B |   |   |   |   |   |   |   |   |    |    |    |    |    |    |    | 3  | 5  | 8  | 10 | 13 | 15 | DI  | B |
| C |   |   |   |   |   |   |   |   |    |    |    |    |    |    |    | 2  | 4  | 7  | 9  | 12 | 14 | Bac | C |
| D |   |   |   |   |   |   |   |   |    |    |    |    |    |    |    | 3  | 5  | 8  | 10 | 13 | 15 | DI  | D |
| E |   |   |   |   |   |   |   |   |    |    |    |    |    |    |    | 2  | 4  | 7  | 9  | 12 | 14 | Bac | E |
| F |   |   |   |   |   |   |   |   |    |    |    |    |    |    |    | 3  | 5  | 8  | 10 | 13 | 15 | DI  | F |
| G |   |   |   |   |   |   |   |   |    |    |    |    |    |    |    | 2  | 4  | 7  | 9  | 12 | 14 | Bac | G |
| H |   |   |   |   |   |   |   |   |    |    |    |    |    |    |    | 3  | 5  | 8  | 10 | 13 | 15 | DI  | H |
| I | 2 | 3 | 4 | 5 | 6 | 7 | 8 | 9 | 10 | 11 | 12 | 13 | 14 | 15 | 16 | 2  | 4  | 7  | 9  | 12 | 14 | Bac | I |
| J |   |   |   |   |   |   |   |   |    |    |    |    |    |    |    | 3  | 5  | 8  | 10 | 13 | 15 | DI  | J |
| K |   |   |   |   |   |   |   |   |    |    |    |    |    |    |    | 2  | 4  | 7  | 9  | 12 | 14 | Bac | K |
| L |   |   |   |   |   |   |   |   |    |    |    |    |    |    |    | 3  | 5  | 8  | 10 | 13 | 15 | DI  | L |
| M |   |   |   |   |   |   |   |   |    |    |    |    |    |    |    | 2  | 4  | 7  | 9  | 12 | 14 | Bac | M |
| N |   |   |   |   |   |   |   |   |    |    |    |    |    |    |    | 3  | 5  | 8  | 10 | 13 | 15 | DI  | N |
| O |   |   |   |   |   |   |   |   |    |    |    |    |    |    |    | 2  | 4  | 7  | 9  | 12 | 14 | Bac | O |
| P |   |   |   |   |   |   |   |   |    |    |    |    |    |    |    | 3  | 5  | 8  | 10 | 13 | 15 | DI  | P |
|   | 2 | 3 | 4 | 5 | 6 | 7 | 8 | 9 | 10 | 11 | 12 | 13 | 14 | 15 | 16 | 17 | 18 | 19 | 20 | 21 | 22 | 23  |   |

|     |                                                                                                  |
|-----|--------------------------------------------------------------------------------------------------|
| 2   | Graphene oxide-2.27 µg/mL<br>Column 2-Samples; Column 17 (A, C, E, etc.)-Blanks no bacteria      |
| 3   | Graphene oxide-1.14 µg/mL<br>Column 3-Samples; Column 17 (B, D, F, etc.)-Blanks no bacteria      |
| 4   | Graphene oxide-0.57 µg/mL<br>Column 4-Samples; Column 18 (A, C, E, etc.)-Blanks no bacteria      |
| 5   | Graphene oxide-0.11 µg/mL<br>Column 5-Samples; Column 18 (B, D, F, etc.)-Blanks no bacteria      |
| 6   | Graphene oxide-0.00 µg/mL<br>Column 6-Samples                                                    |
| 7   | MoS <sub>2</sub> -2.50 µg/mL<br>Column 7-Samples; Column 19 (A, C, E, etc.)-Blanks no bacteria   |
| 8   | MoS <sub>2</sub> -1.14 µg/mL<br>Column 8-Samples; Column 19 (B, D, F, etc.)-Blanks no bacteria   |
| 9   | MoS <sub>2</sub> -0.62 µg/mL<br>Column 9-Samples; Column 20 (A, C, E, etc.)-Blanks no bacteria   |
| 10  | MoS <sub>2</sub> -0.12 µg/mL<br>Column 10-Samples; Column 20 (B, D, F, etc.)-Blanks no bacteria  |
| 11  | MoS <sub>2</sub> -0.00 µg/mL<br>Column 11-Samples                                                |
| 12  | MoSe <sub>2</sub> -2.52 µg/mL<br>Column 12-Samples; Column 21 (A, C, E, etc.)-Blanks no bacteria |
| 13  | MoSe <sub>2</sub> -1.26 µg/mL<br>Column 13-Samples; Column 21 (B, D, F, etc.)-Blanks no bacteria |
| 14  | MoSe <sub>2</sub> -0.63 µg/mL<br>Column 14-Samples; Column 22 (A, C, E, etc.)-Blanks no bacteria |
| 15  | MoSe <sub>2</sub> -0.13 µg/mL<br>Column 15-Samples; Column 22 (B, D, F, etc.)-Blanks no bacteria |
| 16  | MoSe <sub>2</sub> -0.00 µg/mL<br>Column 16-Samples                                               |
| Bac | Bacteria and DI water                                                                            |
| DI  | DI water                                                                                         |

Table S2: Microplate layouts for membrane permeability assays

Plate 1:

|   | 1 | 2   | 3   | 4   | 5   | 6   | 7   | 8   | 9     | 10    | 11 | 12 |
|---|---|-----|-----|-----|-----|-----|-----|-----|-------|-------|----|----|
| A |   |     |     |     |     |     |     |     |       |       |    |    |
| B |   | STD   | STD   |    |    |
| C |   | STD   | STD   |    |    |
| D |   | 2   | 3   | 4   | 5   | 6   | 7   | 8   | DI    | DI    |    |    |
| E |   | 2   | 3   | 4   | 5   | 6   | 7   | 8   | Blank | Blank |    |    |
| F |   | 2   | 3   | 4   | 5   | 6   | 7   | 8   | PBS   | PBS   |    |    |
| G |   | 2   | 3   | 4   | 5   | 6   | 7   | 8   | Stain | Stain |    |    |
| H |   |     |     |     |     |     |     |     |       |       |    |    |

Plate 2:

|   | 1 | 2   | 3   | 4   | 5   | 6   | 7   | 8   | 9     | 10    | 11 | 12 |
|---|---|-----|-----|-----|-----|-----|-----|-----|-------|-------|----|----|
| A |   |     |     |     |     |     |     |     |       |       |    |    |
| B |   | STD   | STD   |    |    |
| C |   | STD   | STD   |    |    |
| D |   | 2   | 3   | 4   | 5   | 6   | 7   | 8   | DI    | DI    |    |    |
| E |   | 2   | 3   | 4   | 5   | 6   | 7   | 8   | Blank | Blank |    |    |
| F |   | 2   | 3   | 4   | 5   | 6   | 7   | 8   | PBS   | PBS   |    |    |
| G |   | 2   | 3   | 4   | 5   | 6   | 7   | 8   | Stain | Stain |    |    |
| H |   |     |     |     |     |     |     |     |       |       |    |    |

| STD   | Standards for percent membrane permeability                              |
|-------|--------------------------------------------------------------------------|
| 2     | Graphene oxide-2.27 µg/mL<br>Plate 1 rows D & E -blanks (no bacteria)    |
| 3     | Graphene oxide-0.11 µg/mL<br>Plate 1 rows D & E-blanks (no bacteria)     |
| 4     | MoS <sub>2</sub> -2.50 µg/mL<br>Plate 1 rows D & E-blanks (no bacteria)  |
| 5     | MoS <sub>2</sub> -0.12 µg/mL<br>Plate 1 rows D & E-blanks (no bacteria)  |
| 6     | MoSe <sub>2</sub> -2.52 µg/mL<br>Plate 1 rows D & E-blanks (no bacteria) |
| 7     | MoSe <sub>2</sub> -0.13 µg/mL<br>Plate 1 rows D & E-blanks (no bacteria) |
| 8     | Control-0.00 µg/mL<br>Plate 1 rows D & E-blanks (no bacteria)            |
| DI    | DI water (200 µL)                                                        |
| Blank | 10% PBS (100 µL) + stain solution (100 µL)                               |
| PBS   | 10 % PBS (100 µL) + DI water (100 µL)                                    |
| Stain | Stain solution (100 µL) + DI water (100 µL)                              |

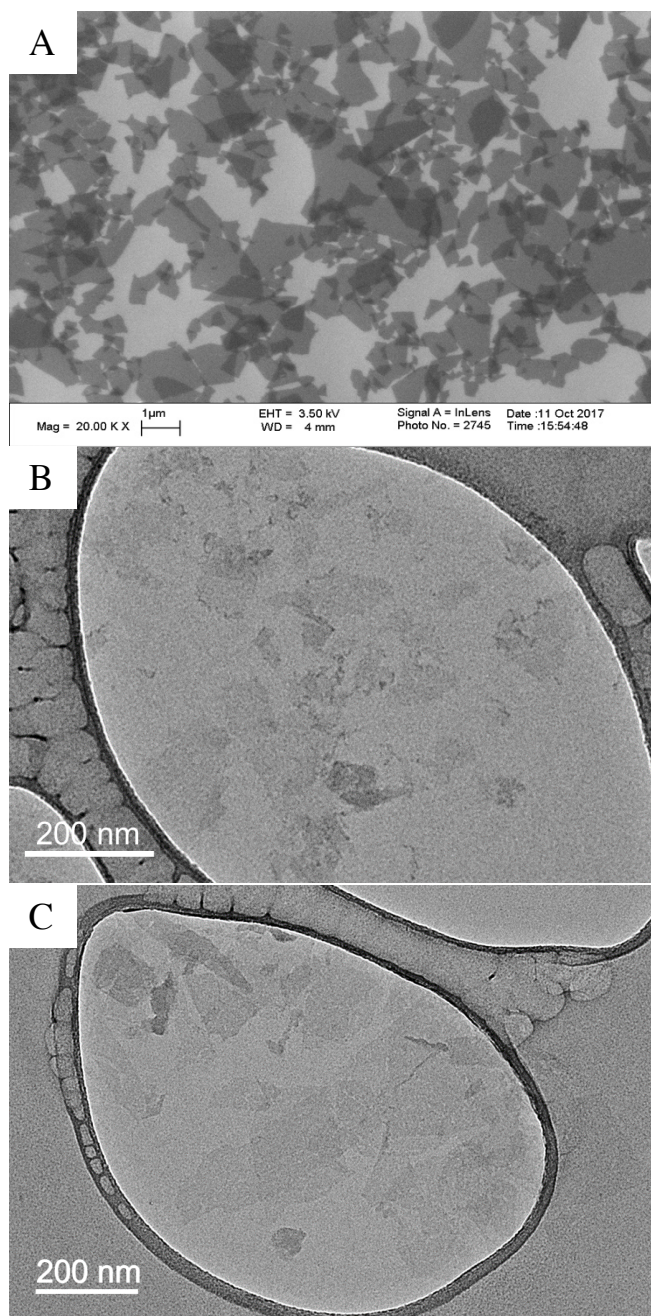

Figure S1: Nanosheets used in this study (A) graphene oxide (GO), (B) MoS<sub>2</sub>, and (C) MoSe<sub>2</sub>. The GO image was acquired using scanning electron microscopy and the Mo materials were imaged with transmission electron microscopy.

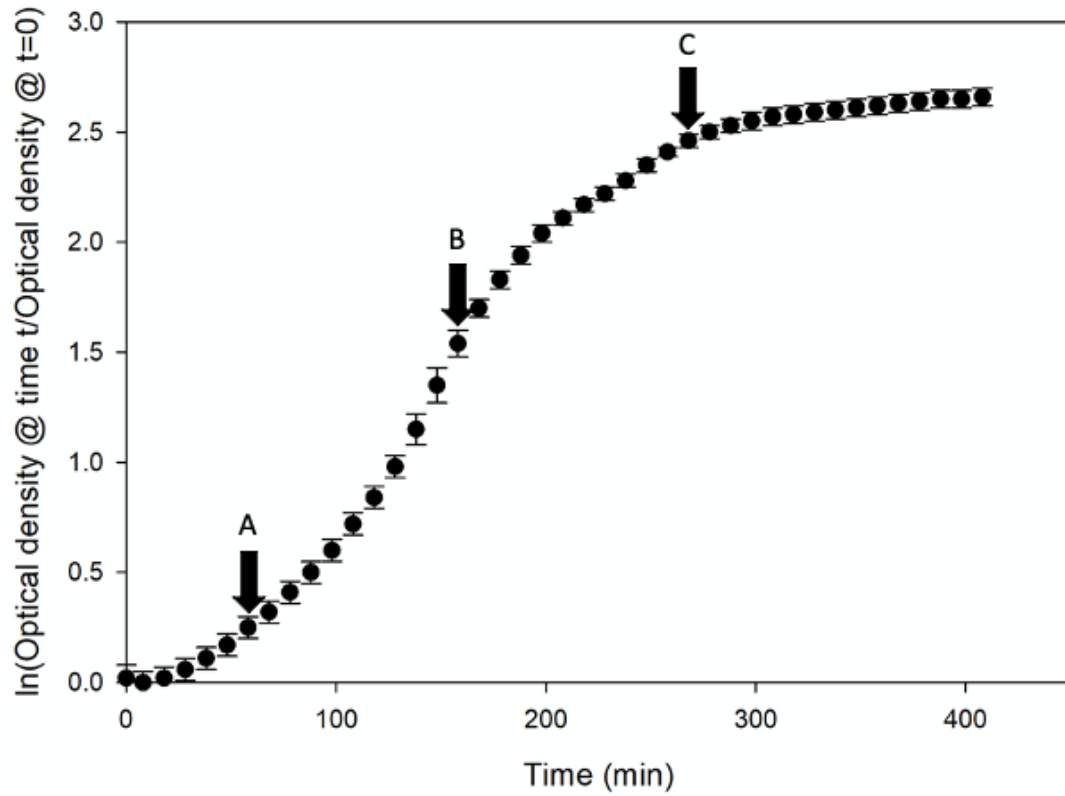

Figure S2: Growth curve of BTF 132 *E. coli* with no nanomaterial addition. Arrows indicate the points in the growth curve where nanosheets were added in later experiments. Each arrow marks the start of a different phase of bacterial growth: exponential phase (A), transition to stationary phase (B), and stationary (C). N=240.

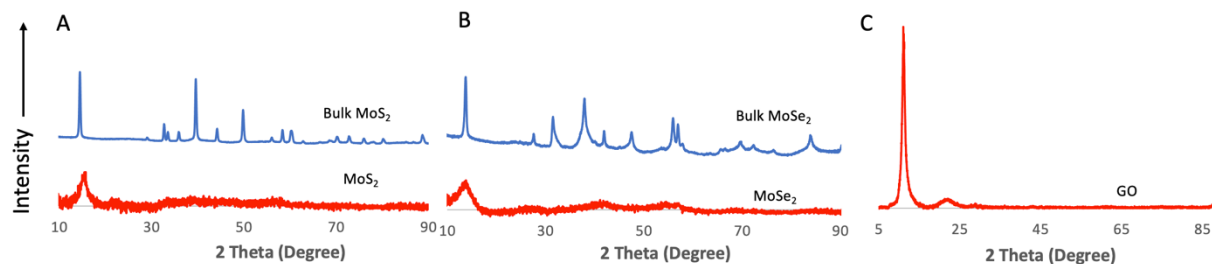

Figure S3: XRD analysis of (A) bulk MoS<sub>2</sub> and MoS<sub>2</sub> nanosheets confirming primary peak at 15.12° (interlayer spacing ~0.59 nm), (B) bulk MoSe<sub>2</sub> and MoSe<sub>2</sub> nanosheets confirming primary peak at 13.76° (interlayer spacing ~0.64 nm), and (C) GO confirming primary peak at 11.02° (interlayer spacing ~0.80 nm).

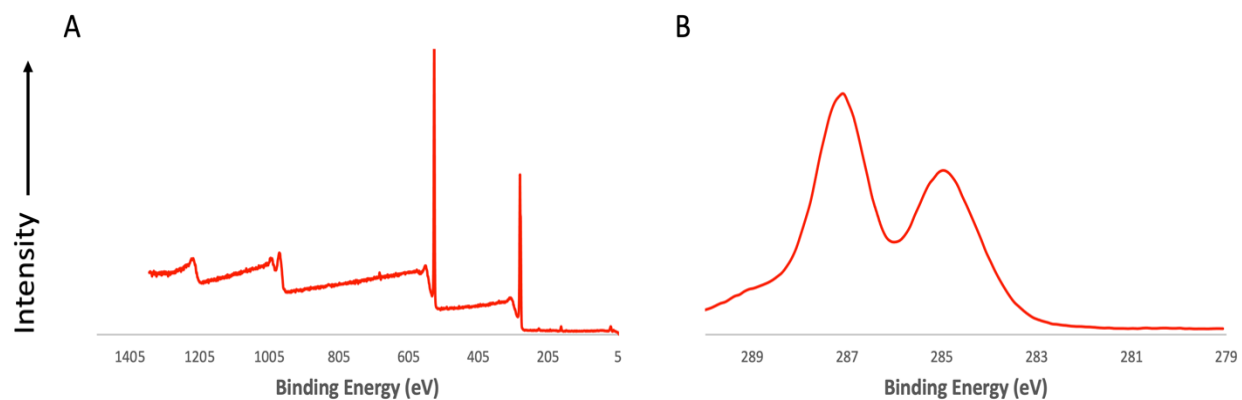

Figure S4: XPS analysis of graphene oxide. (A) Survey scan quantifying carbon:oxygen ratios of 1.94:1. (B) High resolution carbon scan confirming the presence of the 5 main bondings reported as base characteristics of GO ( C=C, C-C, C-O, C=O, and O-C=O).

Table S3: Maximum, mean, and minimum values for respiration slopes (Figure 1 in main paper)

|                              | Maximum | Mean   | Minimum |
|------------------------------|---------|--------|---------|
| GO 0.00 µg/mL                | 0.0016  | 0.0012 | 0.0007  |
| GO 0.11 µg/mL                | 0.0017  | 0.0012 | 0.0008  |
| GO 0.57 µg/mL                | 0.0018  | 0.0012 | 0.0007  |
| GO 1.14 µg/mL                | 0.0016  | 0.0011 | 0.0005  |
| GO 2.27 µg/mL                | 0.0015  | 0.0010 | 0.0005  |
| MoS <sub>2</sub> 0.00 µg/mL  | 0.0021  | 0.0012 | 0.0008  |
| MoS <sub>2</sub> 0.12 µg/mL  | 0.0019  | 0.0012 | 0.0008  |
| MoS <sub>2</sub> 0.62 µg/mL  | 0.0018  | 0.0012 | 0.0007  |
| MoS <sub>2</sub> 1.14 µg/mL  | 0.0019  | 0.0012 | 0.0007  |
| MoS <sub>2</sub> 2.50 µg/mL  | 0.0030  | 0.0012 | 0.0003  |
| MoSe <sub>2</sub> 0.00 µg/mL | 0.0017  | 0.0012 | 0.0008  |
| MoSe <sub>2</sub> 0.13 µg/mL | 0.0019  | 0.0012 | 0.0008  |
| MoSe <sub>2</sub> 0.63 µg/mL | 0.0022  | 0.0012 | 0.0008  |
| MoSe <sub>2</sub> 1.26 µg/mL | 0.0023  | 0.0013 | 0.0008  |
| MoSe <sub>2</sub> 2.52 µg/mL | 0.0027  | 0.0012 | 0.0008  |

Table S4: Maximum, mean, and minimum values for exponential phase growth rates normalized to average control (Figure 2 in main paper)

|                                         | Maximum | Mean | Minimum |
|-----------------------------------------|---------|------|---------|
| GO 0.11 $\mu\text{g/mL}$                | 1.21    | 1.02 | 0.87    |
| GO 0.57 $\mu\text{g/mL}$                | 1.32    | 1.04 | 0.88    |
| GO 1.14 $\mu\text{g/mL}$                | 1.36    | 1.13 | 0.95    |
| GO 2.27 $\mu\text{g/mL}$                | 1.52    | 1.22 | 1.01    |
| MoS <sub>2</sub> 0.12 $\mu\text{g/mL}$  | 1.17    | 1.01 | 0.85    |
| MoS <sub>2</sub> 0.62 $\mu\text{g/mL}$  | 1.11    | 0.99 | 0.85    |
| MoS <sub>2</sub> 1.14 $\mu\text{g/mL}$  | 1.11    | 0.98 | 0.83    |
| MoS <sub>2</sub> 2.50 $\mu\text{g/mL}$  | 1.10    | 0.96 | 0.80    |
| MoSe <sub>2</sub> 0.13 $\mu\text{g/mL}$ | 1.12    | 1.00 | 0.85    |
| MoSe <sub>2</sub> 0.63 $\mu\text{g/mL}$ | 1.14    | 1.02 | 0.87    |
| MoSe <sub>2</sub> 1.26 $\mu\text{g/mL}$ | 1.11    | 1.02 | 0.89    |
| MoSe <sub>2</sub> 2.52 $\mu\text{g/mL}$ | 1.14    | 1.02 | 0.88    |

Table S5: Maximum, mean, and minimum values for transitional phase growth rates normalized to average control (Figure 2 in main paper)

|                                         | Maximum | Mean | Minimum |
|-----------------------------------------|---------|------|---------|
| GO 0.11 $\mu\text{g/mL}$                | 1.33    | 0.98 | 0.35    |
| GO 0.57 $\mu\text{g/mL}$                | 1.28    | 0.97 | 0.29    |
| GO 1.14 $\mu\text{g/mL}$                | 1.24    | 0.93 | 0.31    |
| GO 2.27 $\mu\text{g/mL}$                | 1.12    | 0.91 | 0.46    |
| MoS <sub>2</sub> 0.12 $\mu\text{g/mL}$  | 1.46    | 1.02 | 0.36    |
| MoS <sub>2</sub> 0.62 $\mu\text{g/mL}$  | 1.44    | 1.01 | 0.35    |
| MoS <sub>2</sub> 1.14 $\mu\text{g/mL}$  | 1.42    | 1.01 | 0.35    |
| MoS <sub>2</sub> 2.50 $\mu\text{g/mL}$  | 1.46    | 1.01 | 0.35    |
| MoSe <sub>2</sub> 0.13 $\mu\text{g/mL}$ | 1.37    | 1.02 | 0.36    |
| MoSe <sub>2</sub> 0.63 $\mu\text{g/mL}$ | 1.48    | 1.07 | 0.43    |
| MoSe <sub>2</sub> 1.26 $\mu\text{g/mL}$ | 1.52    | 1.07 | 0.43    |
| MoSe <sub>2</sub> 2.52 $\mu\text{g/mL}$ | 1.54    | 1.06 | 0.39    |

Table S6: Maximum, mean, and minimum values for stationary phase growth rates normalized to average control (Figure 2 in main paper)

|                                         | Maximum | Mean | Minimum |
|-----------------------------------------|---------|------|---------|
| GO 0.11 $\mu\text{g/mL}$                | 1.89    | 0.94 | -1.26   |
| GO 0.57 $\mu\text{g/mL}$                | 1.90    | 0.93 | -1.44   |
| GO 1.14 $\mu\text{g/mL}$                | 1.84    | 0.77 | -1.32   |
| GO 2.27 $\mu\text{g/mL}$                | 1.61    | 0.12 | -1.86   |
| MoS <sub>2</sub> 0.12 $\mu\text{g/mL}$  | 2.27    | 1.05 | -1.21   |
| MoS <sub>2</sub> 0.62 $\mu\text{g/mL}$  | 2.08    | 1.00 | -1.67   |
| MoS <sub>2</sub> 1.14 $\mu\text{g/mL}$  | 2.07    | 0.99 | -1.64   |
| MoS <sub>2</sub> 2.50 $\mu\text{g/mL}$  | 2.12    | 0.96 | -1.73   |
| MoSe <sub>2</sub> 0.13 $\mu\text{g/mL}$ | 2.03    | 1.02 | -1.61   |
| MoSe <sub>2</sub> 0.63 $\mu\text{g/mL}$ | 2.07    | 1.09 | -1.61   |
| MoSe <sub>2</sub> 1.26 $\mu\text{g/mL}$ | 2.02    | 1.01 | -1.62   |
| MoSe <sub>2</sub> 2.52 $\mu\text{g/mL}$ | 1.93    | 1.01 | -1.40   |

Table S7: Skewness, Kurtosis, and Ryan-Joiner test results for the respiration curve slopes (Figure 1)

| Variable                     | Skewness | Kurtosis | Ryan-Joiner statistic | P-value for Ryan-Joiner |
|------------------------------|----------|----------|-----------------------|-------------------------|
| GO 0.00 µg/mL                | 0.610    | -0.660   | 0.964                 | <0.01                   |
| GO 0.11 µg/mL                | 0.600    | -0.700   | 0.965                 | <0.01                   |
| GO 0.57 µg/mL                | 0.520    | -0.250   | 0.982                 | <0.01                   |
| GO 1.14 µg/mL                | 0.220    | -0.550   | 0.986                 | 0.034                   |
| GO 2.27 µg/mL                | 0.580    | -0.620   | 0.968                 | <0.01                   |
| MoS <sub>2</sub> 0.00 µg/mL  | 1.040    | 0.910    | 0.964                 | <0.01                   |
| MoS <sub>2</sub> 0.12 µg/mL  | 0.600    | -0.380   | 0.978                 | <0.01                   |
| MoS <sub>2</sub> 0.62 µg/mL  | 0.490    | -0.400   | 0.980                 | <0.01                   |
| MoS <sub>2</sub> 1.14 µg/mL  | 0.540    | -0.510   | 0.979                 | <0.01                   |
| MoS <sub>2</sub> 2.50 µg/mL  | 0.860    | 2.540    | 0.972                 | <0.01                   |
| MoSe <sub>2</sub> 0.00 µg/mL | 0.620    | -0.640   | 0.971                 | <0.01                   |
| MoSe <sub>2</sub> 0.13 µg/mL | 0.510    | -0.330   | 0.985                 | 0.022                   |
| MoSe <sub>2</sub> 0.63 µg/mL | 0.900    | 0.750    | 0.971                 | <0.01                   |
| MoSe <sub>2</sub> 1.26 µg/mL | 1.040    | 1.240    | 0.968                 | <0.01                   |
| MoSe <sub>2</sub> 2.52 µg/mL | 1.600    | 4.690    | 0.943                 | <0.01                   |

Table S8: Skewness, Kurtosis, and Ryan-Joiner test results for the *E. coli* growth rates after nanomaterial introduction in the exponential phase (Figure 2)

| Variable                     | Skewness | Kurtosis | Ryan-Joiner statistic | P-value for Ryan-Joiner |
|------------------------------|----------|----------|-----------------------|-------------------------|
| GO 0.11 µg/mL                | 0.210    | -0.210   | 0.990                 | >0.1                    |
| GO 0.57 µg/mL                | 0.610    | 1.800    | 0.971                 | 0.032                   |
| GO 1.14 µg/mL                | 0.200    | 0.050    | 0.995                 | >0.1                    |
| GO 2.27 µg/mL                | 0.630    | 0.500    | 0.982                 | >0.1                    |
| MoS <sub>2</sub> 0.12 µg/mL  | -0.350   | -0.270   | 0.984                 | >0.1                    |
| MoS <sub>2</sub> 0.62 µg/mL  | -0.480   | -0.810   | 0.976                 | 0.053                   |
| MoS <sub>2</sub> 1.14 µg/mL  | -0.450   | -0.920   | 0.974                 | 0.045                   |
| MoS <sub>2</sub> 2.50 µg/mL  | -0.390   | -1.170   | 0.961                 | <0.01                   |
| MoSe <sub>2</sub> 0.13 µg/mL | -0.720   | 0.100    | 0.972                 | 0.036                   |
| MoSe <sub>2</sub> 0.63 µg/mL | -0.560   | 0.020    | 0.977                 | 0.068                   |
| MoSe <sub>2</sub> 1.26 µg/mL | -0.490   | -0.730   | 0.979                 | 0.088                   |
| MoSe <sub>2</sub> 2.52 µg/mL | -0.510   | -0.490   | 0.973                 | 0.040                   |

Table S9: Skewness, Kurtosis, and Ryan-Joiner test results for the *E. coli* growth rates after nanomaterial introduction in the transitional phase (Figure 2)

| Variable                     | Skewness | Kurtosis | Ryan-Joiner statistic | P-value for Ryan-Joiner |
|------------------------------|----------|----------|-----------------------|-------------------------|
| GO 0.11 µg/mL                | -0.550   | 0.070    | 0.986                 | >0.1                    |
| GO 0.57 µg/mL                | -0.870   | 0.690    | 0.970                 | 0.030                   |
| GO 1.14 µg/mL                | -0.730   | -0.150   | 0.961                 | <0.01                   |
| GO 2.27 µg/mL                | -0.850   | -0.300   | 0.942                 | <0.01                   |
| MoS <sub>2</sub> 0.12 µg/mL  | -0.380   | 1.040    | 0.984                 | >0.1                    |
| MoS <sub>2</sub> 0.62 µg/mL  | -0.450   | 0.610    | 0.987                 | >0.1                    |
| MoS <sub>2</sub> 1.14 µg/mL  | -0.530   | 0.630    | 0.986                 | >0.1                    |
| MoS <sub>2</sub> 2.50 µg/mL  | -0.510   | 0.630    | 0.988                 | >0.1                    |
| MoSe <sub>2</sub> 0.13 µg/mL | -0.670   | 0.440    | 0.976                 | 0.055                   |
| MoSe <sub>2</sub> 0.63 µg/mL | -0.520   | 0.740    | 0.988                 | >0.1                    |
| MoSe <sub>2</sub> 1.26 µg/mL | -0.400   | 0.460    | 0.991                 | >0.1                    |
| MoSe <sub>2</sub> 2.52 µg/mL | -0.230   | 0.310    | 0.993                 | >0.1                    |

Table S10: Skewness, Kurtosis, and Ryan-Joiner test results for the *E. coli* growth rates after nanomaterial introduction in the stationary phase (Figure 2)

| Variable                     | Skewness | Kurtosis | Ryan-Joiner statistic | P-value for Ryan-Joiner |
|------------------------------|----------|----------|-----------------------|-------------------------|
| GO 0.11 µg/mL                | -1.300   | 1.050    | 0.929                 | <0.01                   |
| GO 0.57 µg/mL                | -1.350   | 1.360    | 0.931                 | <0.01                   |
| GO 1.14 µg/mL                | -1.120   | 0.770    | 0.950                 | <0.01                   |
| GO 2.27 µg/mL                | -0.850   | 1.340    | 0.971                 | 0.032                   |
| MoS <sub>2</sub> 0.12 µg/mL  | -1.160   | 0.760    | 0.942                 | <0.01                   |
| MoS <sub>2</sub> 0.62 µg/mL  | -1.490   | 1.980    | 0.924                 | <0.01                   |
| MoS <sub>2</sub> 1.14 µg/mL  | -1.250   | 1.210    | 0.943                 | <0.01                   |
| MoS <sub>2</sub> 2.50 µg/mL  | -1.270   | 1.180    | 0.939                 | <0.01                   |
| MoSe <sub>2</sub> 0.13 µg/mL | -1.460   | 1.810    | 0.924                 | <0.01                   |
| MoSe <sub>2</sub> 0.63 µg/mL | -1.510   | 1.860    | 0.916                 | <0.01                   |
| MoSe <sub>2</sub> 1.26 µg/mL | -1.410   | 1.370    | 0.920                 | <0.01                   |
| MoSe <sub>2</sub> 2.52 µg/mL | -1.310   | 0.940    | 0.919                 | <0.01                   |

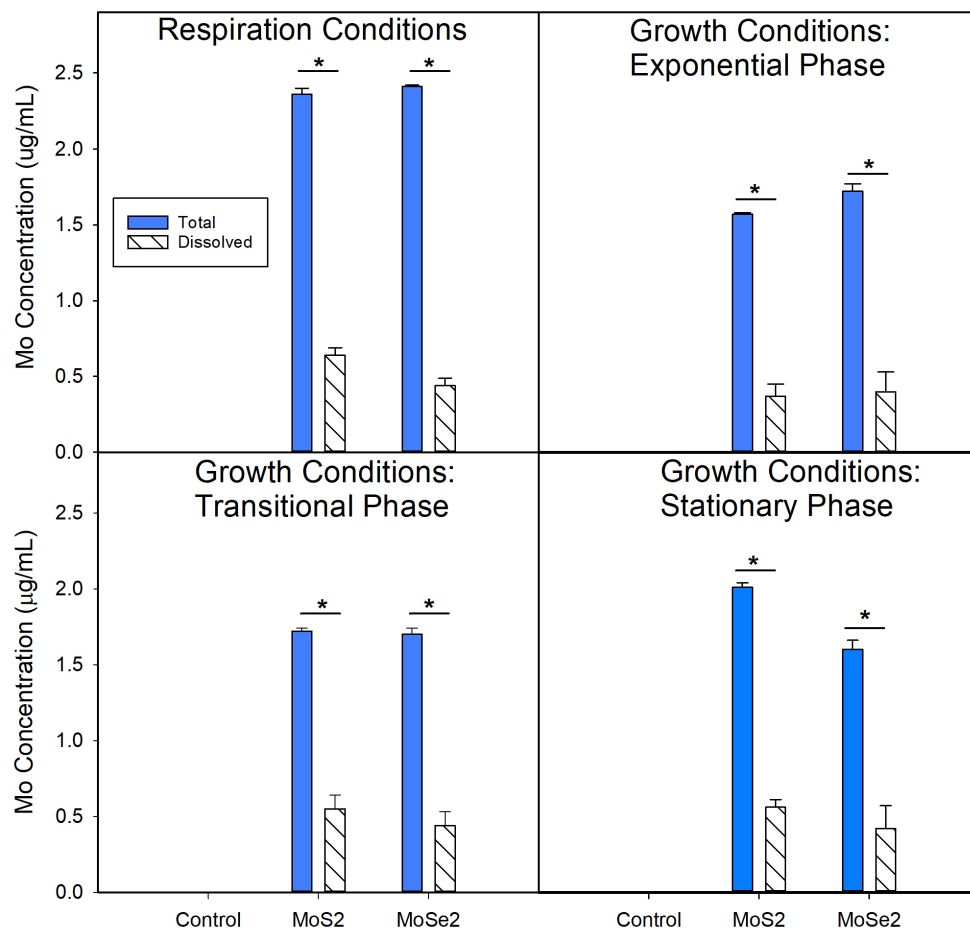

Figure S5: Total (solid blue) vs. dissolved (black striped) fractions of MoS<sub>2</sub> and MoSe<sub>2</sub> after exposure to bacteria in the respiration and growth media for 2 hours. Asterisks (\*) indicate statistically significant differences ( $p < 0.05$ ) in the concentration of molybdenum (T test,  $n=4$ ).

## References:

1 Z. Wang, W. Zhu, Y. Qiu, X. Yi, A. von dem Bussche, A. Kane, H. Gao, K. Koski and R. Hurt, *Chemical Society Reviews*, 2016, **45**, 1750-1780 (DOI:10.1039/c5cs00914).

2 Y. Li, H. Yuan, A. von dem Bussche, M. Creighton, R. H. Hurt, A. B. Kane and H. Gao, *Proceedings of the National Academy of Sciences - PNAS*, 2013, **110**, 12295-12300 (DOI:10.1073/pnas.1222276110).
